# Supplementary material for: Shared HLA Class I and II Alleles and Clonally Restricted Public and Private Brain-Infiltrating αβ T Cells in a Cohort of Rasmussen Encephalitis Surgery Patients
Source: PubMed Central journal article supplement (PMC5165278; doi:10.3389/fimmu.2016.00608), 2016-12-19
Supplement: Data_Sheet_1.pdf [file Data_Sheet_1.pdf]

# Shared HLA Class I and II Alleles and Clonally Restricted Public and Private Brain-Infiltrating $\alpha\beta$ T Cells in a Cohort of Rasmussen Encephalitis Surgery Patients.

Sugandha Dandekar, Hemani Wijesuriya, Tim Geiger, David Hamm, Gary W. Mathern, Geoffrey C. Owens\*

\*Correspondence: Geoffrey C. Owens: [geoffreyowens@mednet.ucla.edu](mailto:geoffreyowens@mednet.ucla.edu)

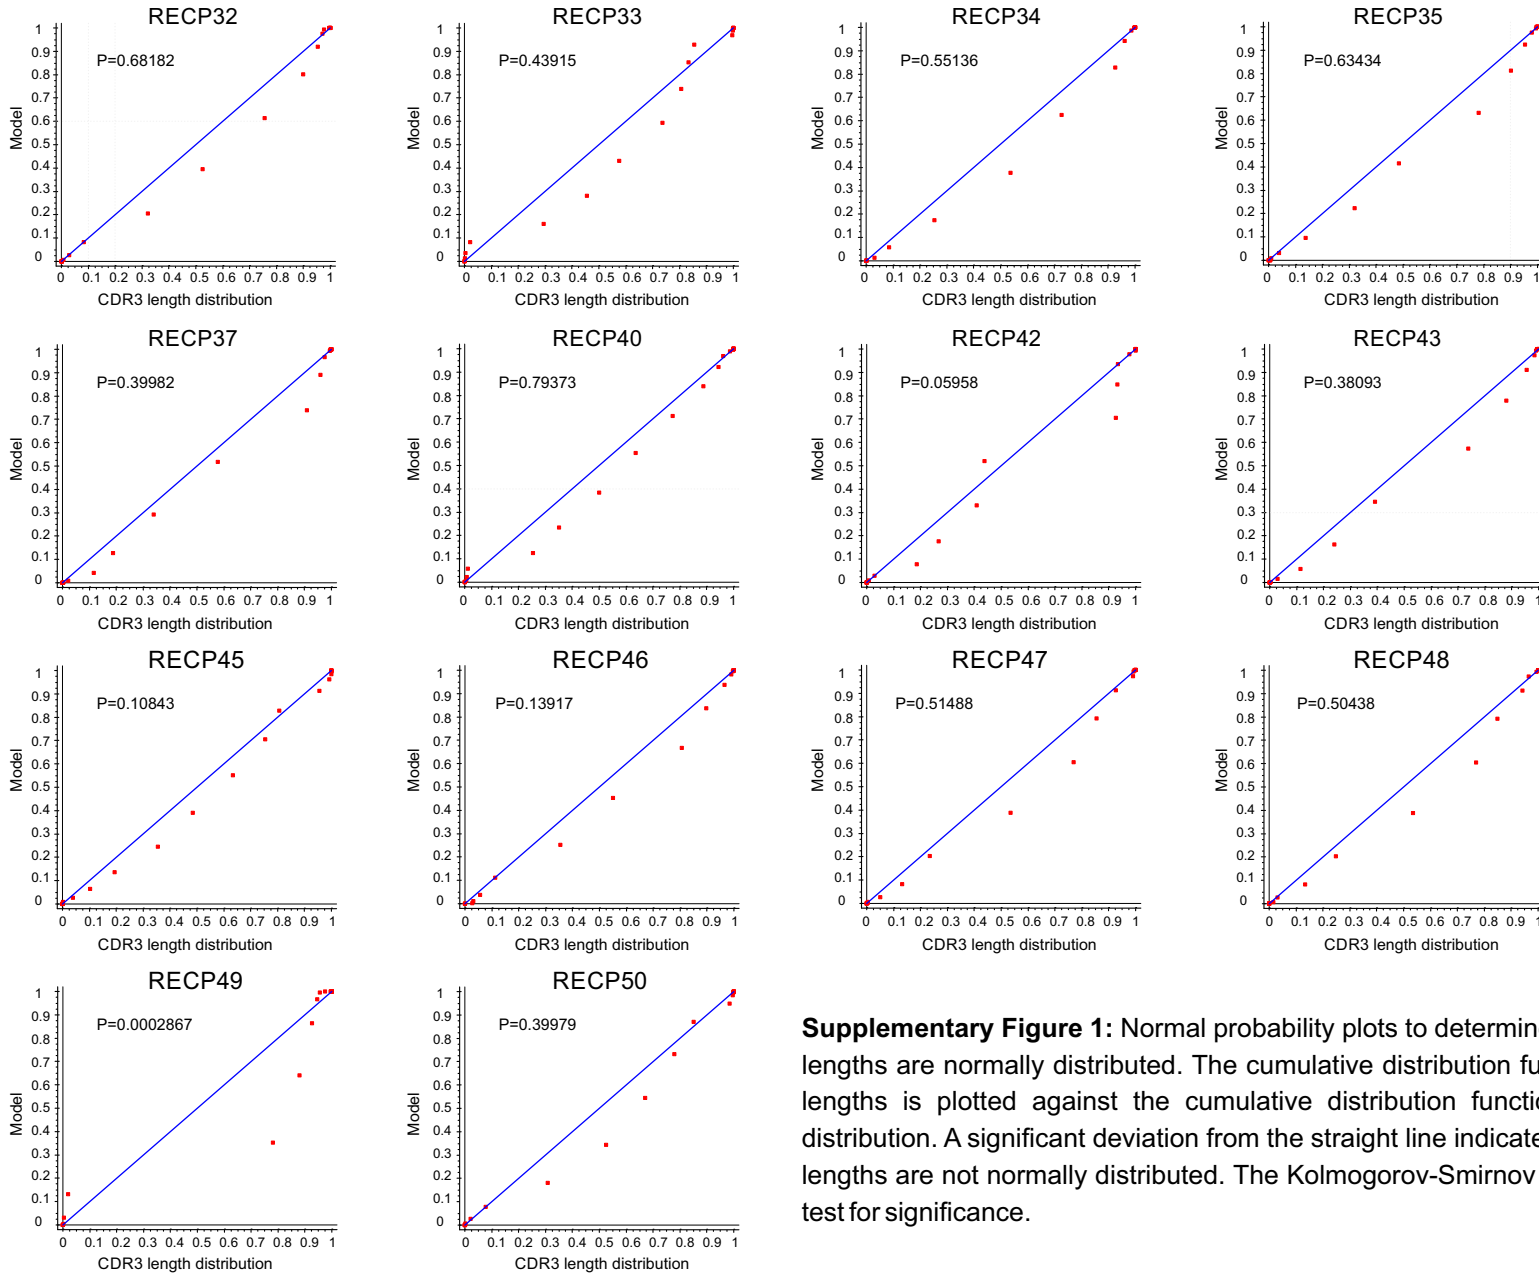

**Supplementary Figure 1:** Normal probability plots to determine whether CDR3 lengths are normally distributed. The cumulative distribution function for CDR3 lengths is plotted against the cumulative distribution function for a normal distribution. A significant deviation from the straight line indicates that the CDR3 lengths are not normally distributed. The Kolmogorov-Smirnov test was used to test for significance.
