# Supplementary material for: Shared HLA Class I and II Alleles and Clonally Restricted Public and Private Brain-Infiltrating αβ T Cells in a Cohort of Rasmussen Encephalitis Surgery Patients
Source: PubMed Central journal article supplement (PMC5165278; doi:10.3389/fimmu.2016.00608), 2016-12-19
Supplement: Data_Sheet_3.pdf [file Data_Sheet_3.pdf]

# Shared HLA Class I and II Alleles and Clonally Restricted Public and Private Brain-Infiltrating $\alpha\beta$ T Cells in a Cohort of Rasmussen Encephalitis Surgery Patients.

Sugandha Dandekar, Hemani Wijesuriya, Tim Geiger, David Hamm, Gary W. Mathern, Geoffrey C. Owens\*

\*Correspondence: Geoffrey C. Owens: geoffreyowens@mednet.ucla.edu

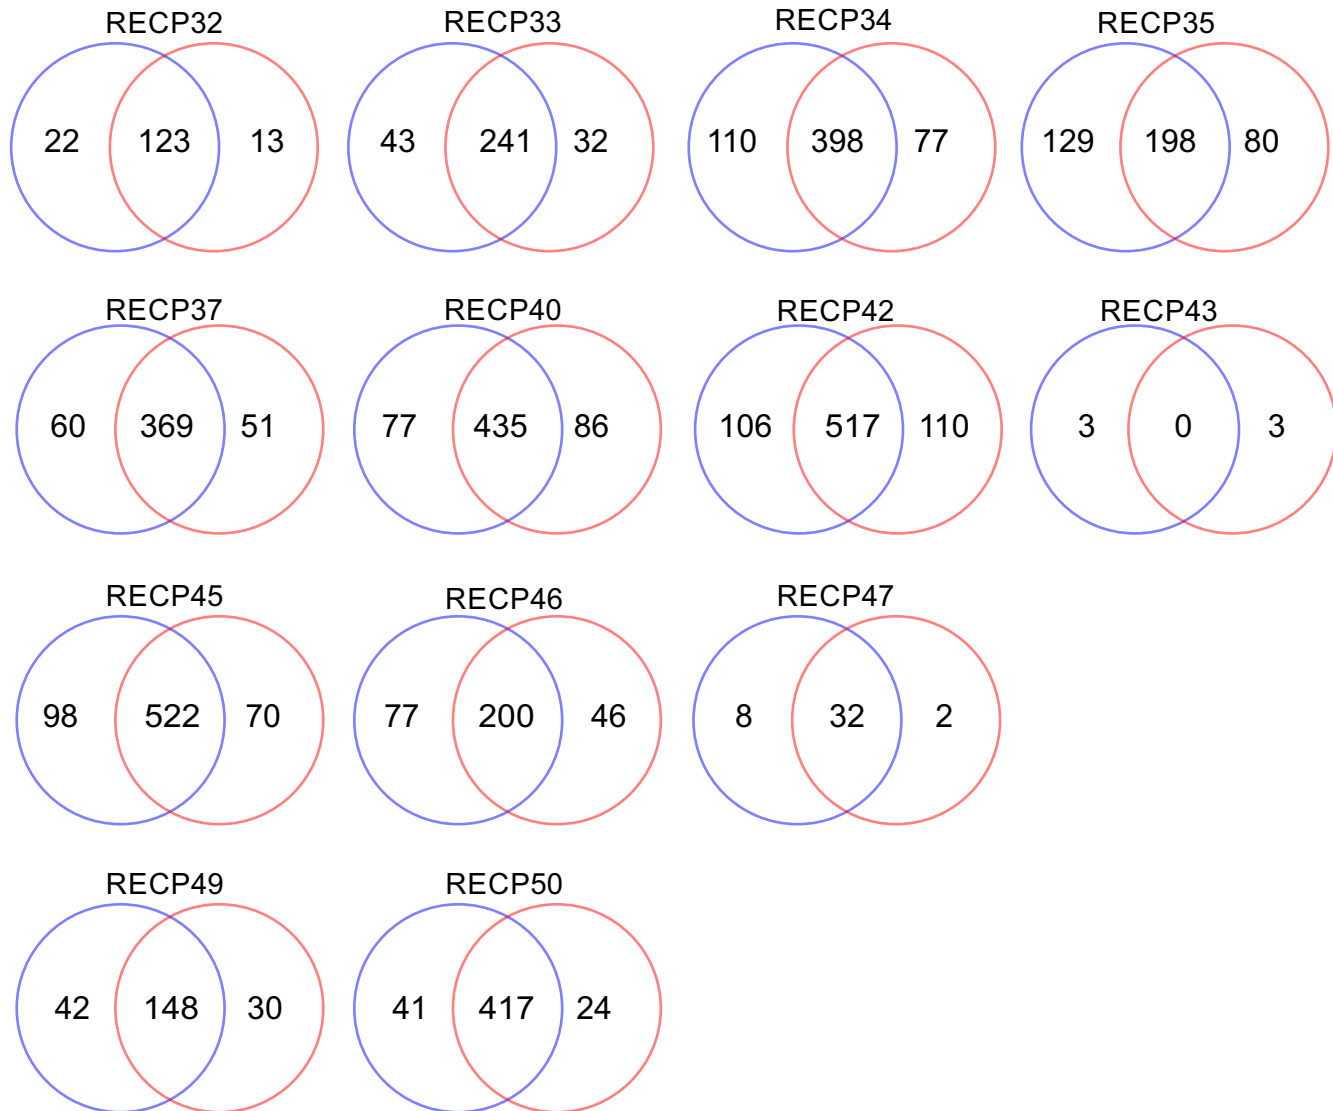

| Case ID      | CDR3 (amino acid) | CDR3 (nucleotide)                         | V $\beta$ gene | Freq. (%) |
|--------------|-------------------|-------------------------------------------|----------------|-----------|
| RECP43 brain | CASSAGNTGELFF     | TGTGCCAGCAGTGCAGGGGAACACCGGGGAGCTGTTTTTTT | TRBV06         | 0.17      |
| RECP43 blood |                   | TGTGCCAGCAGTGCAGGGGAACACCGGGGAGCTGTTTTTTT | TRBV06         | 0.003     |
| RECP43 brain | CASSLQGTEAFF      | TGTGCCAGCAGCTTACAGGGAACTGAAGCTTTCTTT      | TRBV07         | 0.17      |
| RECP43 blood |                   | TGTGCCAGCAGTTTACAGGGCACTGAAGCTTTCTTT      | TRBV28         | 0.003     |
| RECP43 brain | CASSPQGHYGYTF     | TGTGCCAGCAGCCCACAGGGCCACTATGGCTACACCTTC   | TRBV12         | 0.17      |
| RECP43 blood |                   | TGTGCCAGCTCACCCACAGGGGCATTATGGCTACACCTTC  | TRBV18         | 0.003     |

**Supplementary Figure 3:** Different T cell clones with the same specificity are present in the brain and blood from Rasmussen encephalitis patients. For each case the number of nucleotide sequences that encode CDR3 sequences that are shared between the brain and the blood were compiled and displayed as a Venn diagram. The nucleotide sequences of the three CDR3s shared by RECP43 brain and blood are presented in the table; differences are shown in red.
