# Supplementary material for: Shared HLA Class I and II Alleles and Clonally Restricted Public and Private Brain-Infiltrating αβ T Cells in a Cohort of Rasmussen Encephalitis Surgery Patients
Source: PubMed Central journal article supplement (PMC5165278; doi:10.3389/fimmu.2016.00608), 2016-12-19
Supplement: Table_1.pdf [file Table_1.pdf]

# Shared HLA Class I and II Alleles and Clonally Restricted Public and Private Brain-Infiltrating $\alpha\beta$ T Cells in a Cohort of Rasmussen Encephalitis Surgery Patients.

Sugandha Dandekar, Hemani Wijesuriya, Tim Geiger, David Hamm, Gary W. Mathern, Geoffrey C. Owens\*

\*Correspondence: Geoffrey C. Owens: geoffreyowens@mednet.ucla.edu

Supplementary Table 1: HLA typing of RE cases

| Case ID | DPA1             |                  | DPB1             |                  | DQA1             |                  | DQB1             |                  | DRB1             |                  | HLA A         |               | HLA B         |               | HLA C         |               |
|---------|------------------|------------------|------------------|------------------|------------------|------------------|------------------|------------------|------------------|------------------|---------------|---------------|---------------|---------------|---------------|---------------|
|         | Allele 1         | Allele 2         | Allele 1         | Allele 2         | Allele 1         | Allele 2         | Allele 1         | Allele 2         | Allele 1         | Allele 2         | Allele 1      | Allele 2      | Allele 1      | Allele 2      | Allele 1      | Allele 2      |
| RECP02  | DPA1*02:01:02    | DPA1*02:02:02    | DPB1*01:01:01    | DPB1*01:01:01    | DQA1*02:01       | DQA1*05:01:01:01 | DQB1*02:01:01    | DQB1*02:02:01:01 | DRB1*03:01:01:01 | DRB1*07:01:01:01 | A*02:01:01:01 | A*02:01:01:01 | B*44:02:01:01 | B*44:02:01:01 | C*05:01:01:01 | C*07:04:01    |
| RECP03  | DPA1*01:03:01:01 | DPA1*01:03:01:01 | DPB1*04:01:01:01 | DPB1*06:01       | DQA1*03:01:01    | DQA1*05:03       | DQB1*03:01:01:01 | DQB1*03:02:01    | DRB1*04:04:01    | DRB1*14:02:01    | A*03:01:01:01 | A*32:01:01    | B*44:02:01:01 | B*40:02:01    | C*03:04:01:01 | C*05:01:01:01 |
| RECP12  | DPA1*02:02:02    | DPA1*03:01       | DPB1*01:01:01    | DPB1*105:01      | DQA1*02:01       | DQA1*04:01:01    | DQB1*02:02:01    | DQB1*04:02:01    | DRB1*03:02:01    | DRB1*07:01:01:01 | A*03:01:01:01 | A*33:01:01    | B*07:02:01    | B*27:03       | C*07:02:01:01 | C*02:02:02:01 |
| RECP16  | DPA1*01:03:01:01 | DPA1*01:03:01:01 | DPB1*04:01:01:01 | DPB1*04:02:01:01 | DQA1*01:01:02    | DQA1*05:03       | DQB1*02:02:01    | DQB1*04:02:01    | DRB1*01:02:01    | DRB1*14:06:01    | A*03:01:01:01 | A*24:02:01:01 | B*14:02:01:01 | B*39:06:02    | C*07:02:01:01 | C*08:02:01:01 |
| RECP26  | DPA1*01:03:01:01 | DPA1*01:03:01:01 | DPB1*04:01:01:01 | DPB1*04:01:01:01 | DQA1*01:02:01:01 | DQA1*05:05:01:01 | DQB1*06:02:01    | DQB1*03:01:01:01 | DRB1*15:01:01:01 | DRB1*01:03       | A*03:01:01:01 | A*24:02:01:01 | B*07:02:01    | B*27:05:02    | C*07:02:01:01 | C*01:02:01    |
| RECP27  | DPA1*01:03:01:01 | DPA1*01:03:01:01 | DPB1*04:01:01:01 | DPB1*03:01:01    | DQA1*04:01:01    | DQA1*01:02:01:01 | DQB1*06:02:02    | DQB1*04:02:01    | DRB1*15:01:01:01 | DRB1*08:01:01    | A*02:01:01:01 | A*03:01:01:01 | B*07:02:01    | B*39:06:02    | C*07:02:01:01 | C*07:02:01:01 |
| RECP30  | DPA1*01:03:01:01 | DPA1*01:03:01:01 | DPB1*04:01:01:01 | DPB1*02:01:02    | DQA1*03:03:01    | DQA1*05:03       | DQB1*03:01:01:01 | DQB1*03:01:01:01 | DRB1*14:02:01    | DRB1*04:01:01    | A*02:01:01:01 | A*01:01:01:01 | B*35:01:04    | B*44:02:07    | C*04:01:01:01 | C*05:01:01:01 |
| RECP31  | DPA1*01:03:01:01 | DPA1*01:03:01:01 | DPB1*04:01:01:01 | DPB1*03:01:01    | DQA1*03:01:01    | DQA1*01:02:01:01 | DQB1*06:04:01    | DQB1*03:02:01    | DRB1*13:02:01    | DRB1*04:01:01    | A*33:03:01    | A*01:01:01:01 | B*15:01:01:01 | B*40:01:02    | C*03:04:27    | C*03:02:02:01 |
| RECP32  | DPA1*01:03:01:01 | DPA1*02:02:02    | DPB1*01:01:01    | DPB1*18:01       | DQA1*04:01:01    | DQA1*05:01:01:01 | DQB1*02:01:01    | DQB1*04:02:01    | DRB1*03:01:01:01 | DRB1*03:02:01    | A*33:03:01    | A*33:03:01    | B*07:02:01    | B*44:03:01:01 | C*04:01:01:01 | C*03:02:02:01 |
| RECP33  | DPA1*01:03:01:01 | DPA1*02:01:08    | DPB1*01:01:01    | DPB1*03:01:01    | DQA1*05:05:01:01 | DQA1*05:01:01:01 | DQB1*02:01:01    | DQB1*03:19       | DRB1*03:01:01:01 | DRB1*11:02:01    | A*02:01:01:01 | A*02:02:01:01 | B*08:01:01    | B*53:01:01    | C*04:01:01:01 | C*07:01:01:01 |
| RECP34  | DPA1*01:03:01:01 | DPA1*02:02:02    | DPB1*04:01:01:01 | DPB1*03:01:01    | DQA1*02:01       | DQA1*01:03:01:01 | DQB1*02:02:01:01 | DQB1*06:03:01    | DRB1*13:01:01    | DRB1*07:01:01:01 | A*03:01:01:01 | A*24:02:01:01 | B*07:02:01    | B*13:02:01    | C*07:02:01:01 | C*06:02:01:01 |
| RECP35  | DPA1*01:03:01:01 | DPA1*01:03:01:01 | DPB1*04:01:01:01 | DPB1*105:01      | DQA1*02:01       | DQA1*03:01:01    | DQB1*03:02:01    | DQB1*03:03:02:01 | DRB1*04:03:01    | DRB1*07:01:01:01 | A*29:02:01:01 | A*68:03:01    | B*35:43:01    | B*44:03:01:01 | C*04:01:01:01 | C*01:02:01    |
| RECP37  | DPA1*01:03:01:01 | DPA1*01:03:01:01 | DPB1*04:01:01:01 | DPB1*03:01:01    | DQA1*01:03:01:01 | DQA1*05:01:01:01 | DQB1*02:01:01    | DQB1*06:03:01    | DRB1*03:01:01:01 | DRB1*13:01:01    | A*02:01:01:01 | A*24:03:01    | B*44:02:01:01 | B*35:01:01:01 | C*04:01:01:01 | C*05:01:01:01 |
| RECP38  | DPA1*01:03:01:01 | DPA1*01:03:01:01 | DPB1*04:02:01:01 | DPB1*02:01:02    | DQA1*02:01       | DQA1*05:05:01:01 | DQB1*02:02:01    | DQB1*03:01:01:01 | DRB1*11:04:01    | DRB1*07:01:01:01 | A*02:01:01:01 | A*24:02:01:01 | B*35:02:01    | B*50:01:01    | C*04:01:01:01 | C*06:02:01:01 |
| RECP39  | DPA1*01:03:01:01 | DPA1*02:06       | DPB1*04:01:01:01 | DPB1*05:01:01    | DQA1*03:02       | DQA1*01:02:01:01 | DQB1*06:02:01    | DQB1*03:03:02:01 | DRB1*15:01:01:01 | DRB1*09:01:02    | A*02:01:01:01 | A*03:01:01:01 | B*07:02:01    | B*07:02:01    | C*07:02:01:01 | C*07:02:01:01 |
| RECP40  | DPA1*01:03:01:01 | DPA1*01:03:01:01 | DPB1*04:01:01:01 | DPB1*04:01:01:01 | DQA1*03:01:01    | DQA1*01:02:02    | DQB1*05:02:01    | DQB1*03:02:01    | DRB1*16:01:01    | DRB1*16:15       | A*68:01:02:01 | A*68:01:02:01 | B*07:02:01    | B*40:01:02    | C*07:02:01:01 | C*03:04:01:01 |
| RECP42  | DPA1*01:03:01:01 | DPA1*01:03:01:01 | DPB1*04:01:01:01 | DPB1*04:01:01:01 | DQA1*02:01       | DQA1*01:02:01:01 | DQB1*06:02:01    | DQB1*02:02:01:01 | DRB1*15:01:01:01 | DRB1*07:01:01:01 | A*23:01:01    | A*11:01:01:01 | B*07:02:01    | B*07:05:01    | C*07:02:01:01 | C*15:05:02    |
| RECP43  | DPA1*01:03:01:01 | DPA1*01:03:01:01 | DPB1*04:02:01:01 | DPB1*03:01:01    | DQA1*03:01:01    | DQA1*05:05:01:01 | DQB1*03:01:01:01 | DQB1*03:02:01    | DRB1*11:04:01    | DRB1*04:03:01    | A*29:02:01:01 | A*11:01:01:01 | B*18:01:01:01 | B*44:03:01:01 | C*07:01:01:01 | C*16:01:01:01 |
| RECP45  | DPA1*01:03:01:01 | DPA1*01:03:01:01 | DPB1*04:01:01:01 | DPB1*02:01:02    | DQA1*04:01:01    | DQA1*01:03:01:01 | DQB1*06:03:01    | DQB1*04:02:01    | DRB1*13:01:01    | DRB1*08:01:01    | A*02:01:01:01 | A*24:02:01:01 | B*15:01:01:01 | B*39:06:02    | C*07:02:01:01 | C*03:03:01    |
| RECP46  | DPA1*01:03:01:01 | DPA1*01:03:01:01 | DPB1*04:02:01:01 | DPB1*04:02:01:01 | DQA1*04:01:01    | DQA1*04:01:01    | DQB1*04:02:01    | DQB1*04:02:01    | DRB1*08:02:01    | DRB1*08:02:01    | A*02:01:01:01 | A*02:01:01:01 | B*40:74       | B*48:13       | C*08:01:01    | C*15:02:01:01 |
| RECP47  | DPA1*02:01:08    | DPA1*03:01       | DPB1*105:01      | DPB1*01:01:01    | DQA1*04:01:01    | DQA1*05:05:01:01 | DQB1*03:19       | DQB1*04:02:01    | DRB1*03:29       | DRB1*11:48       | A*02:01:01:01 | A*80:01:01:01 | B*35:01:01:01 | B*78:01:01    | C*04:01:09    | C*16:01:06    |
| RECP48  | DPA1*01:03:01:01 | DPA1*01:03:01:01 | DPB1*04:02:01:01 | DPB1*03:01:01    | DQA1*03:01:01    | DQA1*05:05:01:01 | DQB1*03:01:01:01 | DQB1*03:02:01    | DRB1*11:04:01    | DRB1*04:03:01    | A*29:02:01:01 | A*11:01:01:01 | B*18:01:01:01 | B*44:03:01:01 | C*07:01:01:01 | C*16:01:01:01 |
| RECP49  | DPA1*01:03:01:01 | DPA1*02:01:01    | DPB1*04:01:01:01 | DPB1*05:01:01    | DQA1*01:02:01:01 | DQA1*01:02:01:01 | DQB1*06:02:01    | DQB1*06:09:01    | DRB1*15:01:01:01 | DRB1*13:02:01    | A*29:02:01:01 | A*03:01:01:01 | B*07:02:01    | B*14:02:01:01 | C*07:02:01:01 | C*08:02:01:01 |
| RECP50  | DPA1*01:03:01:01 | DPA1*02:01:01    | DPB1*04:01:01:01 | DPB1*11:01:01    | DQA1*02:01       | DQA1*01:02:01:01 | DQB1*06:02:01    | DQB1*02:02:01    | DRB1*15:01:01:01 | DRB1*07:01:01:01 | A*29:02:01:01 | A*68:01:02:01 | B*15:01:01:01 | B*44:03:01:01 | C*03:04:01:01 | C*16:01:01:01 |

RECP, RE Children's Project
