# Supplementary material for: Shared HLA Class I and II Alleles and Clonally Restricted Public and Private Brain-Infiltrating αβ T Cells in a Cohort of Rasmussen Encephalitis Surgery Patients
Source: PubMed Central journal article supplement (PMC5165278; doi:10.3389/fimmu.2016.00608), 2016-12-19
Supplement: Table_2.pdf [file Table_2.pdf]

# Shared HLA Class I and II Alleles and Clonally Restricted Public and Private Brain-Infiltrating $\alpha\beta$ T Cells in a Cohort of Rasmussen Encephalitis Surgery Patients.

Sugandha Dandekar, Hemani Wijesuriya, Tim Geiger, David Hamm, Gary W. Mathern, Geoffrey C. Owens\*

\*Correspondence: Geoffrey C. Owens: geoffreyowens@mednet.ucla.edu

**Supplementary Table 2: Nucleotide sequences of top CDR3s in RE brain specimens with multiple TRBV gene usage.**

| Case ID                          | CDR3 (amino acid)                             | CDR3 (nucleotide)                                        | V $\beta$ gene                   | Freq.  |
|----------------------------------|-----------------------------------------------|----------------------------------------------------------|----------------------------------|--------|
| RECP33 brain                     | CAISESNYGYTF                                  | TGTGCCATCAGTGAATCTAACTATGGCTACACCTTCGGTTC                | TRBV6                            | 0.65   |
|                                  |                                               | TGTGCCATCAGTGAATCTAACTATGGCTACACCTTCGGTTC                | TRBV10                           | 99.35  |
|                                  | CASSLLVVESELHTGELFF                           | TGTTGGTGGTGGAGTCGGAGTTGCACACCGGGGAGCTGTTTTT              | TRBV4                            | 0.18   |
|                                  |                                               | TGTTGGTGGTGGAGTCGGAGTTGCACACCGGGGAGCTGTTTTT              | TRBV5                            | 99.28  |
| CASSKTSKTPDNEQFF                 | TGTGCCAGCAGCAAGACTAGCGGCCTGACAATGAGCAGTTCCTTC | TRBV7                                                    | 98.66                            |        |
|                                  | TGTGCCAGCAGCAAGACTAGCGGCCTGACAATGAGCAGTTCCTTC | TRBV11                                                   | 1.34                             |        |
| RECP34 brain                     | CASAEEWSSYNSPLHF                              | TGTGCCAGCGCCGAGGAGTGGAGTCTCTATAATTCACCCCTCCACTTT         | TRBV6                            | 99.89  |
|                                  |                                               | TGTGCCAGCGCCGAGGAGTGGAGTCTCTATAATTCACCCCTCCACTTT         | TRBV10                           | 0.11   |
|                                  | CASSQDTPGGFYEQYF                              | TGCGCCAGCAGCCAAGACACTCCGGGACAGTTCACGAGCAGTACTTC          | TRBV1                            | 0.15   |
|                                  |                                               | TGCGCCAGCAGCCAAGACACTCCGGGACAGTTCACGAGCAGTACTTC          | TRBV4                            | 98.78  |
| RECP35 brain                     | CASSLRGTGNTEAFF                               | TGTGCCAGCAGCTTAAGGGGAACGGGGAACACTGAAGCTTCTTT             | TRBV2                            | 0.2    |
|                                  |                                               | TGTGCCAGCAGCTTAAGGGGAACGGGGAACACTGAAGCTTCTTT             | TRBV4                            | 0.39   |
|                                  |                                               | TGTGCCAGCAGCTTAAGGGGAACGGGGAACACTGAAGCTTCTTT             | TRBV7                            | 0.2    |
|                                  |                                               | TGTGCCAGCAGCTTAAGGGGAACGGGGAACACTGAAGCTTCTTT             | TRBV12                           | 0.39   |
|                                  |                                               | TGTGCCAGCAGCTTAAGGGGAACGGGGAACACTGAAGCTTCTTT             | TRBV19                           | 0.59   |
|                                  |                                               | TGTGCCAGCAGCTTAAGGGGAACGGGGAACACTGAAGCTTCTTT             | TRBV27                           | 0.39   |
| RECP35 brain                     | CASSLRGTGNTEAFF                               | TGTGCCAGCAGCTTAAGGGGAACGGGGAACACTGAAGCTTCTTT             | TRBV28                           | 0.39   |
|                                  |                                               | TGTGCCAGCAGCTTAAGGGGAACGGGGAACACTGAAGCTTCTTT             | TRBV30                           | 97.45  |
|                                  |                                               | TGTGCCAGCAGCTTAAGGGGAACGGGGAACACTGAAGCTTCTTT             | TRBV2                            | 99.72  |
| RECP35 brain                     | CASSGPGPSTGELFF                               | TGTGCCAGCGGCCAGGGGGCCGAGCACCGGGGAGCTGTTTTT               | TRBV12                           | 0.28   |
|                                  |                                               | TGTGCCAGCGGCCAGGGGGCCGAGCACCGGGGAGCTGTTTTT               | TRBV13                           | 99.78  |
| RECP35 brain                     | CASSSTSDTQYF                                  | TGTGCCAGCAGTACATCTAGCACAGATACGCAGTATTTT                  | TRBV2                            | 99.69  |
|                                  |                                               | TGTGCCAGCAGTACATCTAGCACAGATACGCAGTATTTT                  | TRBV6                            | 0.31   |
| RECP37 brain                     | CASSQDPQALNEQFF                               | TGCGCCAGCAGCCAAGATCCCCAGGGGGCGCTGAATGAGCAGTTCCTTC        | TRBV4                            | 99.28  |
|                                  |                                               | TGCGCCAGCAGCCAAGATCCCCAGGGGGCGCTGAATGAGCAGTTCCTTC        | TRBV5                            | 0.36   |
|                                  |                                               | TGCGCCAGCAGCCAAGATCCCCAGGGGGCGCTGAATGAGCAGTTCCTTC        | TRBV7                            | 0.09   |
|                                  |                                               | TGCGCCAGCAGCCAAGATCCCCAGGGGGCGCTGAATGAGCAGTTCCTTC        | TRBV11                           | 0.18   |
|                                  |                                               | TGCGCCAGCAGCCAAGATCCCCAGGGGGCGCTGAATGAGCAGTTCCTTC        | TRBV11                           | 0.09   |
| RECP40 brain                     | CASSVAYEQYF                                   | TGTGCCAGCAGTGTAGCTACGAGCAGTACTTC                         | TRBV2                            | 0.04   |
|                                  |                                               | TGTGCCAGCAGTGTAGCTACGAGCAGTACTTC                         | TRBV3                            | 0.2    |
|                                  |                                               | TGTGCCAGCAGTGTAGCTACGAGCAGTACTTC                         | TRBV6                            | 64.08  |
|                                  |                                               | TGTGCCAGCAGTGTAGCTACGAGCAGTACTTC                         | TRBV6                            | 34.86  |
|                                  |                                               | TGTGCCAGCAGTGTAGCTACGAGCAGTACTTC                         | TRBV6                            | 0.4    |
|                                  |                                               | TGTGCCAGCAGTGTAGCTACGAGCAGTACTTC                         | TRBV10                           | 0.15   |
|                                  |                                               | TGTGCCAGCAGTGTAGCTACGAGCAGTACTTC                         | TRBV12                           | 0.15   |
|                                  |                                               | TGTGCCAGCAGTGTAGCTACGAGCAGTACTTC                         | TRBV25                           | 0.04   |
|                                  | TGTGCCAGCAGTGTAGCTACGAGCAGTACTTC              | TRBV27                                                   | 0.08                             |        |
|                                  | RECP40 brain                                  | CASSVAYEQYF                                              | TGTGCCAGCAGTGTAGCTACGAGCAGTACTTC | TRBV3  |
| TGTGCCAGCAGTGTAGCTACGAGCAGTACTTC |                                               |                                                          | TRBV6                            | 99.67  |
| RECP42 brain                     | CASSVDHRAGKPYEQYF                             | TGTGCCAGTGTAGTGTGGATCACAGGGCAGGGAAACCCCTACGAGCAGTACTTC   | TRBV5                            | 0.004  |
|                                  |                                               | TGTGCCAGTGTAGTGTGGATCACAGGGCAGGGAAACCCCTACGAGCAGTACTTC   | TRBV19                           | 99.971 |
|                                  |                                               | TGTGCCAGTGTAGTGTGGATCACAGGGCAGGGAAACCCCTACGAGCAGTACTTC   | TRBV19                           | 0.025  |
| RECP42 brain                     | CATSVTTGGYTEAFF                               | TGTGCCACCAAGTGTACAAACAGGGGTTTACACTGAAGCTTCTTT            | TRBV12                           | 0.02   |
|                                  |                                               | TGTGCCACCAAGTGTACAAACAGGGGTTTACACTGAAGCTTCTTT            | TRBV24                           | 99.98  |
| RECP42 brain                     | CASSGGSTDTQYF                                 | TGTGCCAGTAGCGGGGGGAGCACAGATACGCAGTATTTT                  | TRBV4                            | 0.02   |
|                                  |                                               | TGTGCCAGTAGCGGGGGGAGCACAGATACGCAGTATTTT                  | TRBV19                           | 99.98  |
| RECP43 brain                     | CASSLQDRGPGGEQYV                              | TGTGCCAGCAGCCTACAGGACAGGGGGCCCGTGGCGAGCAGTACGTC          | TRBV7                            | 3.33   |
|                                  |                                               | TGTGCCAGCAGCCTACAGGACAGGGGGCCCGTGGCGAGCAGTACGTC          | TCRBV11                          | 96.67  |
| RECP45 brain                     | CASSLRNYDDRVGYYEQYF                           | TGTGCCAGCAGTTTACGAAACTACGACGACAGGGTGGGTACTACGAGCAGTACTTC | TRBV6                            | 0.08   |
|                                  |                                               | TGTGCCAGCAGTTTACGAAACTACGACGACAGGGTGGGTACTACGAGCAGTACTTC | TRBV12                           | 0.04   |
|                                  |                                               | TGTGCCAGCAGTTTACGAAACTACGACGACAGGGTGGGTACTACGAGCAGTACTTC | TRBV27                           | 99.8   |
|                                  |                                               | TGTGCCAGCAGTTTACGAAACTACGACGACAGGGTGGGTACTACGAGCAGTACTTC | TRBV28                           | 0.08   |
| RECP45 brain                     | CASSLGTGDRSNQPHF                              | TGTGCCAGCAGTTTACGAAACTACGACGACAGGGTGGGTACTACGAGCAGTACTTC | TRBV6                            | 0.02   |
|                                  |                                               | TGTGCCAGCAGTTTACGAAACTACGACGACAGGGTGGGTACTACGAGCAGTACTTC | TRBV28                           | 99.98  |
| RECP49 brain                     | CASQLGAATGYTF                                 | TGTGCCAGCCAGCTGGGGCCGCGACTGGCTACACCTTC                   | TRBV4                            | 0.04   |
|                                  |                                               | TGTGCCAGCCAGCTGGGGCCGCGACTGGCTACACCTTC                   | TRBV5                            | 0.06   |
|                                  |                                               | TGTGCCAGCCAGCTGGGGCCGCGACTGGCTACACCTTC                   | TRBV7                            | 0.08   |
|                                  |                                               | TGTGCCAGCCAGCTGGGGCCGCGACTGGCTACACCTTC                   | TCRBV11                          | 99.82  |
| RECP50                           | CASSLSSFQETQYF                                | TGTGCCAGCAGCTTATCTTCATTCCAAGAGACCCAGTACTTC               | TRBV7                            | 99.78  |
|                                  |                                               | TGTGCCAGCAGCTTATCTTCATTCCAAGAGACCCAGTACTTC               | TRBV11                           | 0.22   |
